# Supplementary material for: Differential MicroRNA Analyses of Burkholderia pseudomallei- and Francisella tularensis-Exposed hPBMCs Reveal Potential Biomarkers
Source: Int J Genomics. 2017 Jul 16;2017:6489383. doi: 10.1155/2017/6489383 (PMC5534298; doi:10.1155/2017/6489383)
Supplement: Supplementary file 3 [file 6489383.f3.xlsx]

## Sheet: Table S1
Table S1 | Correlation value (r) between duplicates
Sample	Time (minutes)	r
hPBMCs alone	0	0.8274
hPBMCs alone	30	0.9999
hPBMCs alone	60	0.9475
hPBMCs alone	120	0.9976
E. coli-exposed hPBMCs	30	0.9608
E. coli-exposed hPBMCs	60	0.9985
E. coli-exposed hPBMCs	120	0.9986
B. pseudomallei-exposed hPBMCs	30	0.8866
B. pseudomallei-exposed hPBMCs	60	0.9987
B. pseudomallei-exposed hPBMCs	120	0.9957
F. tularensis-exposed hPBMCs	30	0.999
F. tularensis-exposed hPBMCs	60	0.8426
F. tularensis-exposed hPBMCs	120	0.9967

## Sheet: Table S2
Table S2 | 34 differentially expressed miRNAs in E. coli-exposed hPBMCs RNAseq data
	Normal Quantile Transformed Data			Fold Change
h	t30	t60	t120	t60/t30	t120/t30	t30/t60	t30/t120	P-value
Downregulation
hsa-miR-143-3p	0.54451	0.435828	0.333553	0.800404	0.612575	1.24937	1.63245	0.0111619
hsa-miR-128	0.527609	0.461088	0.398892	0.87392	0.756037	1.14427	1.32269	0.012349
hsa-miR-570-5p	4.09453	2.67025	1.34356	0.652151	0.328136	1.53339	3.04752	0.0130371
hsa-miR-548ai*	4.09453	2.67025	1.34356	0.652151	0.328136	1.53339	3.04752	0.0130371
hsa-miR-548b-3p	4.19339	2.67025	1.2608	0.636776	0.300664	1.57041	3.32597	0.0142465
hsa-let-7f-2-3p	0.962093	0.788178	0.629044	0.819233	0.653829	1.22065	1.52945	0.0163082
hsa-miR-3065-3p	1.6581	1.37048	1.10924	0.826541	0.668984	1.20986	1.4948	0.0176514
hsa-miR-34c-5p	1.19411	1.11972	1.03741	0.937704	0.868773	1.06643	1.15105	0.0185767
hsa-miR-134	1.30895	4.21584	2.49764	3.22078	1.90813	0.310484	0.524074	0.0190798
hsa-miR-30c-1-3p	0.982467	0.858141	0.718792	0.873455	0.73162	1.14488	1.36683	0.0209317
hsa-miR-126-3p	0.695977	0.64745	0.604716	0.930275	0.868873	1.07495	1.15092	0.0233206
hsa-miR-127-5p*	4.19339	2.67025	1.47354	0.636776	0.351395	1.57041	2.8458	0.0440416
hsa-miR-449b-3p	4.19339	2.67025	1.47354	0.636776	0.351395	1.57041	2.8458	0.0440416
hsa-miR-3920	4.19339	2.67025	1.47354	0.636776	0.351395	1.57041	2.8458	0.0440416
hsa-miR-30	4.19339	2.67025	1.47354	0.636776	0.351395	1.57041	2.8458	0.0440416
hsa-miR-4651*	4.19339	2.67025	1.47354	0.636776	0.351395	1.57041	2.8458	0.0440416
hsa-miR-4731-3p	4.19339	2.67025	1.47354	0.636776	0.351395	1.57041	2.8458	0.0440416
hsa-miR-7-5p	1.09933	1.07214	1.03741	0.975266	0.943679	1.02536	1.05968	0.0446499
hsa-miR-30d-3p	0.861085	0.718792	0.533203	0.834752	0.619222	1.19796	1.61493	0.0484414
Upregulation
hsa-miR-129-5p	1.54943	2.67025	3.77061	1.72337	2.43354	0.580258	0.410924	0.00338482
hsa-miR-411-3p	1.54943	2.67025	3.77061	1.72337	2.43354	0.580258	0.410924	0.00338482
hsa-miR-4777-3p	1.54943	2.67025	3.77061	1.72337	2.43354	0.580258	0.410924	0.00338482
hsa-miR-656	1.25198	2.67025	3.99989	2.13283	3.19487	0.46886	0.313002	0.0118541
hsa-miR-299-5p	1.6581	2.67025	3.77061	1.61043	2.27406	0.620951	0.439741	0.0153437
hsa-miR-586	1.6581	2.67025	3.77061	1.61043	2.27406	0.620951	0.439741	0.0153437
hsa-miR-1273c	1.6581	2.67025	3.77061	1.61043	2.27406	0.620951	0.439741	0.0153437
hsa-miR-4648	1.6581	2.67025	3.77061	1.61043	2.27406	0.620951	0.439741	0.0153437
hsa-miR-5193	1.6581	2.67025	3.77061	1.61043	2.27406	0.620951	0.439741	0.0153437
hsa-miR-548d-5p	1.30895	2.67025	4.20115	2.03999	3.20956	0.490198	0.311569	0.0215454
hsa-miR-29a-3p	0	0.0963234	0.180884		1.87789			0.0238939
hsa-miR-338-5p	1.54943	2.67025	3.99989	1.72337	2.58152	0.580258	0.387369	0.031297
hsa-miR-92a-1-5p	0.806965	0.974716	1.10924	1.20788	1.37458	0.827897	0.727494	0.0403512
*placed on miScript assay; Black-shaded boxes indicate fold changes equal to or greater than 2

## Sheet: Table S3
Table S3 | 27 differentially expressed miRNAs in B. pseudomallei-exposed hPBMCs RNAseq data
	Normal Quantile Transformed Data			Fold Change
miRNA	t30	t60	t120	t60/t30	t120/t30	t30/t60	t30/t120	P-value
Downregulation
hsa-miR-196b-3p	4.16495	2.64253	1.0583	0.634468	0.254097	1.57612	3.93551	0.00731152
hsa-miR-3161	4.16495	2.64253	1.0583	0.634468	0.254097	1.57612	3.93551	0.00731152
hsa-miR-4487	4.16495	2.64253	1.0583	0.634468	0.254097	1.57612	3.93551	0.00731152
hsa-miR-4507	4.16495	2.64253	1.0583	0.634468	0.254097	1.57612	3.93551	0.00731152
hsa-miR-548an	4.16495	2.64253	1.0583	0.634468	0.254097	1.57612	3.93551	0.00731152
hsa-miR-4682	4.16495	2.64253	1.0583	0.634468	0.254097	1.57612	3.93551	0.00731152
hsa-miR-4741	4.16495	2.64253	1.0583	0.634468	0.254097	1.57612	3.93551	0.00731152
hsa-miR-124-3p	2.68331	1.66183	0.689356	0.619322	0.256905	1.61467	3.89249	0.00903212
hsa-miR-125b-2-3p	2.68331	1.66183	0.689356	0.619322	0.256905	1.61467	3.89249	0.00903212
hsa-miR-2114-5p	2.68331	1.66183	0.689356	0.619322	0.256905	1.61467	3.89249	0.00903212
hsa-miR-5000-5p	2.68331	1.66183	0.689356	0.619322	0.256905	1.61467	3.89249	0.00903212
hsa-miR-153	2.68331	1.50414	0.232103	0.560554	0.0864988	1.78395	11.5609	0.0139229
hsa-miR-548at-5p	1.40855	1.22516	1.0583	0.869802	0.751339	1.14969	1.33096	0.0173411
hsa-miR-127-5p*	4.4503	2.64253	1.0583	0.593786	0.237804	1.68411	4.20514	0.0242117
hsa-miR-4651*	4.4503	2.64253	1.0583	0.593786	0.237804	1.68411	4.20514	0.0242117
hsa-miR-3613-3p	1.6887	1.40855	1.0583	0.834106	0.626697	1.19889	1.59567	0.0408197
hsa-miR-941	0.232103	0.102971	4.38667e-06	0.443643				0.0413779
hsa-miR-96-5p	4.6348	4.02009	3.53048	0.867372	0.761732	1.15291	1.3128	0.041574
hsa-miR-4755-3p	4.16495	2.64253	0.689356	0.634468	0.165514	1.57612	6.0418	0.0454749
Upregulation
hsa-miR-10b-5p*	1.55925	2.64253	3.62677	1.69474	2.32596	0.590062	0.429929	0.0176013
hsa-miR-3177-3p*	1.6887	2.64253	3.48333	1.56483	2.06273	0.639046	0.484794	0.023139
hsa-miR-200b-3p*	1.55925	2.64253	3.53048	1.69474	2.26421	0.590062	0.441655	0.0363804
hsa-miR-3074-3p*	1.46451	2.64253	3.59701	1.80438	2.45612	0.554208	0.407146	0.0384805
hsa-miR-135b-5p*	1.6887	2.64253	3.40733	1.56483	2.01773	0.639046	0.495607	0.0403722
hsa-miR-4662a-3p*	1.6887	2.64253	3.40733	1.56483	2.01773	0.639046	0.495607	0.0403722
hsa-miR-4688*	1.6887	2.64253	3.40733	1.56483	2.01773	0.639046	0.495607	0.0403722
hsa-miR-4755-5p*	1.6887	2.64253	3.40733	1.56483	2.01773	0.639046	0.495607	0.0403722
*placed on miScript assay; Black-shaded boxes indicate fold changes equal to or greater than 2

## Sheet: Table S4
Table S4 | 26 differentially expressed miRNAs in F. tularensis-exposed hPBMCs RNAseq
	Normal Quantile Transformed Data			Fold Change
miRNA	t30	t60	t120	t60/t30	t120/t30	t30/t60	t30/t120	P-value
Downregulation
hsa-miR-1226-3p*	3.76825	2.55208	1.41848	0.67726	0.37643	1.47654	2.65654	0.012913
hsa-miR-548a-5p	3.76825	2.55208	1.41848	0.67726	0.37643	1.47654	2.65654	0.012913
hsa-miR-4523*	3.5631	2.55208	1.41848	0.716253	0.398103	1.39615	2.51191	0.021001
hsa-miR-4709-3p	3.5631	2.55208	1.41848	0.716253	0.398103	1.39615	2.51191	0.021001
hsa-miR-4796-3p	3.5631	2.55208	1.41848	0.716253	0.398103	1.39615	2.51191	0.021001
hsa-miR-548t-5p	3.5631	2.55208	1.41848	0.716253	0.398103	1.39615	2.51191	0.021001
hsa-miR-655	3.5631	2.55208	1.41848	0.716253	0.398103	1.39615	2.51191	0.021001
hsa-miR-485-5p*	3.76825	2.55208	1.15536	0.67726	0.306603	1.47654	3.26154	0.0253858
hsa-miR-378h	3.5631	2.55208	1.2447	0.716253	0.349331	1.39615	2.86262	0.0468997
hsa-miR-4773	3.5631	2.55208	1.2447	0.716253	0.349331	1.39615	2.86262	0.0468997
hsa-miR-548u	3.5631	2.55208	1.2447	0.716253	0.349331	1.39615	2.86262	0.0468997
hsa-miR-328	0.617463	0.564067	0.523256	0.913524	0.847429	1.09466	1.18004	0.0490023
Upregulation
hsa-miR-323b-3p*	1.26478	2.55208	3.84266	2.01781	3.03821	0.495586	0.329141	0.000465939
hsa-miR-5586-3p*	1.26478	2.55208	3.84266	2.01781	3.03821	0.495586	0.329141	0.000465939
hsa-miR-154-5p*	0.85177	1.14035	1.41848	1.3388	1.66534	0.746937	0.60048	0.00677631
hsa-miR-2964a-3p*	0.85177	1.61082	2.42854	1.89114	2.85117	0.528782	0.350733	0.0136772
hsa-let-7d-5p*	0	0.0830782	0.159814					0.0145831
hsa-miR-30c-5p*	0.157614	0.207943	0.263736	1.31932	1.6733	0.757966	0.59762	0.018917
hsa-miR-3613-3p*	0.873725	1.61082	2.42854	1.84362	2.77953	0.542412	0.359773	0.0190569
hsa-miR-424-3p*	0.85177	0.928085	1.01314	1.0896	1.18945	0.917772	0.840725	0.0198965
hsa-miR-3909*	0.523256	0.677372	0.856082	1.29453	1.63607	0.772479	0.611221	0.0271434
hsa-miR-3667-3p*	0.906014	1.18208	1.41848	1.30471	1.56563	0.766455	0.63872	0.0284336
hsa-miR-125b-5p*	0.380146	0.608117	0.888239	1.59969	2.33657	0.62512	0.427978	0.0376813
hsa-miR-4802-3p*	0.96169	1.61082	2.42854	1.67498	2.52529	0.597021	0.395994	0.0421853
hsa-miR-579*	0.96169	1.61082	2.42854	1.67498	2.52529	0.597021	0.395994	0.0421853
hsa-miR-874*	0.441857	0.581705	0.691025	1.3165	1.56391	0.75959	0.639424	0.0449575
*placed on miScript assay; Black-shaded boxes indicate fold changes equal to or greater than 2

## Sheet: Table S5
Table S5 List of 31 miRNAs included in the miScript miRNA PCR assay
miRNA	Normal Quantile Transformed Data				Fold Change				Observed in organism-exposed hPBMCs	Expression Pattern
	t30	t60	t120	P-value	t60/t30	t120/t30	t30/t60	t30/t120
hsa-miR-548ai	4.09453	2.67025	1.34356	0.0130371	0.652151	0.328136	1.53339	3.04752	E. coli	Downregulation
hsa-miR-127-5p*	4.19339	2.67025	1.47354	0.0440416	0.636776	0.351395	1.57041	2.8458	E. coli/B. pseudomallei	Downregulation
hsa-miR-4651*	4.19339	2.67025	1.47354	0.0440416	0.636776	0.351395	1.57041	2.8458	E. coliB. pseudomallei	Downregulation
hsa-miR-196b-3p	4.16495	2.64253	1.0583	0.00731152	0.634468	0.254097	1.57612	3.93551	B. pseudomallei	Downregulation
hsa-miR-125b-2-3p	2.68331	1.66183	0.689356	0.00903212	0.619322	0.256905	1.61467	3.89249	B. pseudomallei	Downregulation
hsa-miR-10b-5p	1.55925	2.64253	3.62677	0.0176013	1.69474	2.32596	0.590062	0.429929	B. pseudomallei	Upregulation
hsa-miR-3177-3p	1.6887	2.64253	3.48333	0.023139	1.56483	2.06273	0.639046	0.484794	B. pseudomallei	Upregulation
hsa-miR-200b-3p	1.55925	2.64253	3.53048	0.0363804	1.69474	2.26421	0.590062	0.441655	B. pseudomallei	Upregulation
hsa-miR-3074-3p	1.46451	2.64253	3.59701	0.0384805	1.80438	2.45612	0.554208	0.407146	B. pseudomallei	Upregulation
hsa-miR-135b-5p	1.6887	2.64253	3.40733	0.0403722	1.56483	2.01773	0.639046	0.495607	B. pseudomallei	Upregulation
hsa-miR-4662a-3p	1.6887	2.64253	3.40733	0.0403722	1.56483	2.01773	0.639046	0.495607	B. pseudomallei	Upregulation
hsa-miR-4688	1.6887	2.64253	3.40733	0.0403722	1.56483	2.01773	0.639046	0.495607	B. pseudomallei	Upregulation
hsa-miR-4755-5p	1.6887	2.64253	3.40733	0.0403722	1.56483	2.01773	0.639046	0.495607	B. pseudomallei	Upregulation
hsa-miR-1226-3p	3.76825	2.55208	1.41848	0.012913	0.67726	0.37643	1.47654	2.65654	F. tularensis	Downregulation
hsa-miR-4523	3.5631	2.55208	1.41848	0.021001	0.716253	0.398103	1.39615	2.51191	F. tularensis	Downregulation
hsa-miR-485-5p	3.76825	2.55208	1.15536	0.0253858	0.67726	0.306603	1.47654	3.26154	F. tularensis	Downregulation
hsa-miR-323b-3p	1.26478	2.55208	3.84266	0.000465939	2.01781	3.03821	0.495586	0.329141	F. tularensis	Upregulation
hsa-miR-5586-3p	1.26478	2.55208	3.84266	0.000465939	2.01781	3.03821	0.495586	0.329141	F. tularensis	Upregulation
hsa-miR-154-5p	0.85177	1.14035	1.41848	0.00677631	1.3388	1.66534	0.746937	0.60048	F. tularensis	Upregulation
hsa-miR-2964a-3p	0.85177	1.61082	2.42854	0.0136772	1.89114	2.85117	0.528782	0.350733	F. tularensis	Upregulation
hsa-let-7d-5p	0	0.0830782	0.159814	0.0145831			0	0	F. tularensis	Upregulation
hsa-miR-30c-5p	0.157614	0.207943	0.263736	0.018917	1.31932	1.6733	0.757966	0.59762	F. tularensis	Upregulation
hsa-miR-3613-3p	0.873725	1.61082	2.42854	0.0190569	1.84362	2.77953	0.542412	0.359773	F. tularensis	Upregulation
hsa-miR-424-3p	0.85177	0.928085	1.01314	0.0198965	1.0896	1.18945	0.917772	0.840725	F. tularensis	Upregulation
hsa-miR-3909	0.523256	0.677372	0.856082	0.0271434	1.29453	1.63607	0.772479	0.611221	F. tularensis	Upregulation
hsa-miR-3667-3p	0.906014	1.18208	1.41848	0.0284336	1.30471	1.56563	0.766455	0.63872	F. tularensis	Upregulation
hsa-miR-125b-5p	0.380146	0.608117	0.888239	0.0376813	1.59969	2.33657	0.62512	0.427978	F. tularensis	Upregulation
hsa-miR-4802-3p	0.96169	1.61082	2.42854	0.0421853	1.67498	2.52529	0.597021	0.395994	F. tularensis	Upregulation
hsa-miR-579	0.96169	1.61082	2.42854	0.0421853	1.67498	2.52529	0.597021	0.395994	F. tularensis	Upregulation
hsa-miR-874	0.441857	0.581705	0.691025	0.0449575	1.3165	1.56391	0.75959	0.639424	F. tularensis	Upregulation
* in B. pseduomallei
hsa-miR-127-5p	4.4503	2.64253	1.0583	0.0242117	0.593786	0.237804	1.68411	4.20514
hsa-miR-4651	4.4503	2.64253	1.0583	0.0242117	0.593786	0.237804	1.68411	4.20514

## Sheet: Table S6
Table S6 | Standard deviations for six housekeeping genes
Housekeeping gene	Standard Deviation
SNORD95	0.7692
SNORD68	0.8154
SNORD96A	0.8652
SNORD61	1.2258
SNORD72	1.3743
RNU6-2	1.3842

## Sheet: Table S7
Table S7 | CT values
Position	miRNA	p_t30_rep2	p_t30_rep2.2	p_t30_rep3	p_t60_rep2	p_t60_rep3	p_t120_rep2	p_t120_rep3	b_t30_rep2	b_t30_rep3	b_t60_rep2	b_t60_rep3	b_t120_rep2	b_t120_rep3	ft_t30_rep2	ft_t30_rep3	ft_t60_rep2	ft_t60_rep3	ft_t120_rep2	ft_t120_rep3	ec_t30_rep2	ec_t30_rep3	ec_t60_rep2	ec_t60_rep3	ec_t120_rep2	ec_t120_rep3
A01	hsa-miR-10b-5p	33.1	32.2	34.15	33.14	34.07	33.03	32.55	34.7	33.04	32.99	32.6	33.31	32.9	32.05	32.18	32.56	32.28	32.09	29.87	33.33	32.73	32.72	32.39	32.23	32.77
A02	hsa-miR-323b-3p	33.47	32.7	34.23	33.56	35.38	33.91	32.85	34.78	33.33	34.21	33.33	33.33	33.01	32.68	33	33.2	32.93	32.71	31.25	33.45	34.13	33.57	33.8	34.72	34.18
A03	hsa-miR-3909	30.99	30.06	31.27	30.31	31.56	29.72	29.76	31.99	30.09	30.45	30.23	29.73	30.17	29.35	30.17	29.58	29.38	29.18	28.12	30.12	30.45	29.59	30.34	30.31	30.6
A04	hsa-miR-125b-2-3p	33.85	32.38	33.95	33.01	34.33	33.01	31.77	33.89	32.7	32.6	32.36	32.86	32.25	31.23	31.79	30.99	30.81	31.06	29.56	35.12	32.86	31.87	32.18	32.69	32.43
A05	hsa-miR-146a-5p	22.42	21.49	22.83	22.41	23.08	22.24	21.52	23.39	21.96	22.9	21.92	22.7	22.16	21.72	22.29	22.25	21.58	21.92	20.48	22.81	22.32	21.77	22.05	21.68	22.1
A06	SNORD95	20	19.08	20.62	19.22	20.95	19.55	19.12	20.61	19.44	19.91	19.31	20.19	19.47	18.81	19.31	19.02	18.92	19.47	17.79	20.98	19.82	18.25	20.2	19.45	19.69
B01	hsa-miR-3177-3p	33.46	32.23	32.96	32.04	33.07	31.86	31.54	33.2	32.2	31.46	31.56	31.84	31.29	31.2	31.65	30.7	30.33	30.26	28.64	32.68	32.32	31.98	31.83	32.78	31.78
B02	hsa-miR-5586-3p	35.48	34.4	35.07	34.51	undetermined	34.26	34.44	37.78	36.11	36.13	35.04	35.19	34.16	33.56	33.67	34.38	33.95	33.64	32.23	35.91	34.85	34.25	34.19	33.9	34.55
B03	hsa-miR-3667-3p	32.41	31.53	34.14	31.38	33.97	31.35	30.82	33.06	31.62	31.55	31.85	32.21	31.36	30.47	31.24	30.75	30.69	30.87	29.55	34.3	31.36	30.66	32.09	31.97	31.33
B04	hsa-miR-1226-3p	32.23	31.25	32.83	31.74	33.42	31.6	31.33	32.87	32.31	31.66	31.99	31.48	31.35	30.78	31.42	31.49	30.57	31.14	29.73	32.7	31.47	31.19	32.14	31.67	31.29
B05	hsa-miR-127-5p	33.52	32	33.13	32.3	33.95	32.88	31.36	33.34	32.33	31.98	32.39	31.53	31.3	31.12	31.09	31.55	30.55	31.07	29.47	32.48	32.25	31.03	32.31	32.49	31.99
B06	SNORD96A	21.2	20.71	22.21	20.79	22.64	20.48	20.24	22.08	20.74	21.44	20.62	21.55	21.17	20.19	21.03	20.78	20.35	20.76	19.43	23.47	21.26	19.97	21.2	20.95	21.25
C01	hsa-miR-200b-3p	29.18	28.16	29.43	28.86	29.64	28.83	28.55	30.41	28.73	29.19	28.52	29.8	28.76	28.28	28.61	28.52	27.85	28.07	26.76	29.6	28.64	28.12	28.69	27.98	28.92
C02	hsa-miR-154-5p	32.23	31.18	32.42	31.48	33.41	30.79	30.61	32.92	31.27	32.06	31.39	31.84	31.69	30.36	30.97	30.57	31.12	30.22	29.33	32.03	31.56	30.43	31.72	31.34	32.06
C03	hsa-miR-125b-5p	28.58	27.6	29.15	27.93	29.55	27.76	27.14	29.2	27.93	29.04	27.71	28.67	28.02	27.57	28.12	27.69	27.33	27.4	26.26	30.42	28.06	27.13	27.79	28.23	28.2
C04	hsa-miR-485-5p	35	33.94	36.29	34.36	36.22	33.45	32.62	34.95	34.17	33.24	33.23	34.97	32.99	33.04	33.05	32.55	32.62	32.59	31.04	35.4	33.74	33.23	33.88	34.41	34.5
C05	hsa-miR-4651	26.31	25.11	26.92	26.21	27.41	26.33	25.06	27.01	25.43	25.88	25.58	25.35	24.14	25	25.23	24.83	24.91	24.49	23.11	25.73	25.86	25.27	26.09	25.25	25.31
C06	miRTC	24.12	23.03	24.18	23.03	24.53	23.08	23.28	24.07	23.25	23.51	23.55	23.08	23.66	22.52	23.76	22.68	23.4	22.7	22.21	26.34	23.49	22.05	23.7	23.15	23.53
D01	hsa-miR-3074-3p	32.87	32.37	34.42	34.21	34.12	32.86	32.3	34.69	33.02	32.92	33.09	33.54	32.87	32.54	32.79	32.65	32.09	31.48	30.7	33.7	32.2	32.28	32.72	33.6	33.26
D02	hsa-miR-2964a-3p	35.07	35.64	undetermined	34.51	38.08	35.12	34.58	37.54	35.72	36.06	35.84	34.1	36.58	38.15	34.82	34.67	34.6	34.92	34.09	35.98	36.77	35.19	undetermined	34.44	36.12
D03	hsa-miR-4802-3p	34.7	34.7	35.14	33.67	35.38	33.13	33.34	36.36	34.16	35.53	33.37	33.65	35.62	32.94	33.44	34.33	33.11	33.3	32.64	35.69	36.53	33.17	33.46	33.47	34.41
D04	hsa-let-7a-2-3p	33.4	32.35	32.95	33.16	34.45	33.1	32.08	34.03	31.88	32.43	32.69	32.03	32.08	30.95	32.36	31.16	31.31	31.52	30.03	32.94	32.39	32.22	33.01	32.8	32.1
D05	hsa-miR-4523	32.58	31.01	32.21	31.75	34.03	31.77	30.72	33.25	31.55	31.92	31.69	31.2	30.96	31.01	31.34	30.41	31.05	30.55	29.57	32.79	31.28	30.86	31.82	31.23	30.83
D06	miRTC	24.12	23.03	24.18	23.03	24.53	23.08	23.28	24.07	23.25	23.51	23.55	23.08	23.66	22.52	23.76	22.68	23.4	22.7	22.21	26.34	23.49	22.05	23.7	23.15	23.53
E01	hsa-miR-135b-5p	32.22	31.42	32.95	31.55	32.55	31.33	31.13	33.19	31.47	31.83	31.29	32.14	32.05	31.68	32.16	31.48	31.02	31.18	30.06	35.08	32.13	30.82	31.57	31.3	32.04
E02	hsa-let-7d-5p	23.47	22.74	23.84	23.27	24.4	23.29	22.93	24.27	23.59	23.78	22.86	23.6	23.02	22.61	22.86	22.86	22.24	22.51	21.34	24.08	23.17	22.4	23.11	22.29	23.04
E03	hsa-miR-579	33.36	32.25	34.02	31.22	34.75	31.62	31.75	33.21	31.78	33.36	32.04	32.71	32.25	31.51	32.37	31.3	32.02	32.12	29.91	34.86	32.07	30.44	32.29	32.58	33.29
E04	hsa-miR-19a-5p	36.06	35.36	undetermined	33.69	36.01	34.64	33.32	35.98	36.87	35.35	34.36	33.98	33.72	34.89	34.83	34.01	33.19	33.73	32.37	undetermined	34.28	33.91	35.32	33.96	34.89
E05	RNU6-2	20.51	19.39	21.62	18.95	22.3	19.33	19.33	21.13	19.52	20.29	19.65	20.34	20	18.99	20.17	19.16	19.47	19.04	17.55	24.72	20.05	18.53	20.23	19.89	20.39
E06	miRTC	24.12	23.03	24.18	23.03	24.53	23.08	23.28	24.07	23.25	23.51	23.55	23.08	23.66	22.52	23.76	22.68	23.4	22.7	22.21	26.34	23.49	22.05	23.7	23.15	23.53
F01	hsa-miR-4662a-3p	34.98	34.08	35.49	34.37	37.18	35.42	34.86	36.47	34.43	34.36	34.23	34.64	34.6	33.51	34.01	34.26	33.44	34.05	32.28	35.26	36.05	34.45	34.83	34.09	35.74
F02	hsa-miR-30c-5p	22.53	22.2	23.19	22.4	23.84	22.62	21.99	23.8	22.55	23.11	22.35	23.35	22.26	22.22	22.53	22.54	21.72	22.34	20.85	24.64	22.68	21.58	22.23	22.34	22.37
F03	hsa-miR-874	28.54	27.67	28.95	27.19	29.48	26.76	27.15	29.07	27.94	28	27.47	28.13	27.97	26.82	27.5	27.27	26.86	26.99	25.49	29.53	27.61	26.49	27.39	27.27	27.64
F04	hsa-miR-92a-2-5p	undetermined	undetermined	39.76	undetermined	undetermined	37.73	37.12	undetermined	undetermined	39	39.11	36.42	37.61	37.26	37.35	36.31	34.86	35.77	35.33	undetermined	38.13	37.08	undetermined	39.49	39.71
F05	SNORD61	21.05	20.34	22.11	19.36	22.73	19.48	19.52	21.25	20.25	20.82	20.26	21.15	20.54	19.85	20.43	19.84	20.01	19.94	18.51	24.58	20.17	19.3	20.26	20.38	20.63
F06	PPC	19.39	18.74	19.66	18.92	19.63	19.33	19.14	19.56	18.97	19.36	19.71	19.18	19.23	19.47	19.42	18.86	19.1	18.91	18.92	18.66	19.25	18.82	19.68	18.85	19.04
G01	hsa-miR-4688	29.7	28.3	29.86	29.37	29.8	28.82	28.81	30.37	29.28	28.91	29.14	28.64	25.82	28.18	28.66	28.17	28.17	27.7	26.94	29.09	29.65	28.42	29.24	28.8	29.07
G02	hsa-miR-3613-3p	26.1	24.66	27	26.11	27.14	25.74	25.62	28.02	26.18	26.17	26.12	26.59	25.68	25.19	25.7	25.95	25.21	25.14	23.52	26.77	26.41	25.34	26.23	25.24	26.28
G03	hsa-miR-548ai	34.14	32.55	34.71	33.91	34.97	32.36	32.03	33.89	32.68	32.79	32.24	31.72	31.32	31.72	32.07	32.22	31.31	31.39	29.84	33.99	32.32	31.3	32.21	33.25	32.79
G04	hsa-miR-208a	36.76	36.38	36.81	36.92	37.02	37.44	35.07	39.24	35.95	37.09	37.16	35.39	35.13	34.88	34.51	34.74	34.49	34.47	32.52	36.3	35.64	35.22	37.16	35.58	35.91
G05	SNORD68	18.09	17.34	19.36	18.14	19.66	17.76	17.45	19.47	18.37	18.92	18.39	18.53	18.14	17.47	18.55	18.02	17.55	18.04	17.11	20.61	18.57	17.55	18.42	17.78	18.28
G06	PPC	19.39	18.74	19.66	18.92	19.63	19.33	19.14	19.56	18.97	19.36	19.71	19.18	19.23	19.47	19.42	18.86	19.1	18.91	18.92	18.66	19.25	18.82	19.68	18.85	19.04
H01	hsa-miR-4755-5p	30.8	29.26	31.04	29.51	31.07	29.17	28.65	31.03	29.67	29.57	29.23	29.12	29.04	28.32	29.29	28.35	28.18	28.1	27.11	30.69	29.82	28.39	29.32	29.08	29.65
H02	hsa-miR-424-3p	29.94	29.65	31.21	29.92	31.28	30.08	29.79	31.39	30.29	30.99	29.89	30.06	29.9	29.92	30.19	30.16	29.66	29.55	28.27	31.14	30.04	29.23	30.02	28.99	30.12
H03	hsa-miR-196b-3p	33.43	31.6	32.94	32.2	33.68	31.85	31.6	33.31	32.17	32.08	31.93	32.47	32.02	31.59	32	31.65	31.38	31.46	29.66	34.17	32.79	31.11	32.29	31.63	32.33
H04	hsa-miR-23b-5p	32.91	32.57	32.2	33.45	32.29	32.64	30.15	32.22	30.89	31.15	31.39	30.71	30.74	30.08	29.95	30.18	29.57	30.07	27.88	30.92	31.49	32.34	32.11	32.06	30.37
H05	SNORD72	26.72	26.03	27.5	24.82	28.08	24.97	24.97	26.52	25.44	26.15	25.47	26.42	26.16	24.95	25.9	25.22	25.46	25.44	23.8	30.78	25.7	24.27	25.27	26.22	26.21
H06	PPC	19.39	18.74	19.66	18.92	19.63	19.33	19.14	19.56	18.97	19.36	19.71	19.18	19.23	19.47	19.42	18.86	19.1	18.91	18.92	18.66	19.25	18.82	19.68	18.85	19.04

## Sheet: Table S8
Table S8 | Fold regulations of miRNAs in different experiments at different time points
miRNA	ft_t30	ft_t60	ft_t120	bp_t30	bp_t60	bp_t120	ec_t30	ec_t60	ec_t120
hsa-miR-125b-2-3p	1.37	1.64335	1.74666	0.476641	0.721679	0.576667	0.508327	0.676628	0.296663
hsa-miR-196b-3p	0.370053	0.298306	0.831634	0.316609	0.466653	0.221692	0.243303	0.271665	0.211635
hsa-miR-10b-5p	0.489954	0.0583858	1.47664	-0.373286	0.341644	0.42664	1.1333	0.0816123	0.756682
hsa-miR-3177-3p	0.765025	0.913339	1.91667	0.381616	0.576667	0.876645	1.24835	-0.318346	-0.1133
hsa-miR-200b-3p	-0.160017	-0.0617071	0.941632	-0.393306	-0.0732718	0.151729	0.72334	-0.123269	0.706641
hsa-miR-3074-3p	-0.0399806	0.668301	1.15666	-0.338339	0.691623	0.116631	1.23334	0.696706	-0.383386
hsa-miR-135b-5p	-0.355016	-0.326652	0.276675	0.126709	0.0216219	-0.123269	-0.441696	-0.1133	0.0267292
hsa-miR-4662a-3p	0.210015	-0.291721	1.43168	0.146655	-0.0783366	1.05165	0.528371	-0.923339	0.851679
hsa-miR-4688	0.340049	0.288299	1.16169	-0.173383	0.091666	2.32665	0.948302	-0.213378	0.346645
hsa-miR-4755-5p	1.09498	0.898324	0.971663	0.441696	0.421695	0.571628	1.20333	0.466653	0.0116388
hsa-miR-127-5p	1.2	0.948302	1.51667	0.361656	0.471656	1.44668	1.49835	0.486663	0.346645
hsa-miR-4651	0.479955	0.813361	1.56164	0.266637	0.611645	1.69167	1.35834	0.161694	0.881665
hsa-miR-548ai	1.51	1.54834	1.24665	1.01164	1.45665	1.41668	1.80834	1.71668	-0.358284
hsa-miR-1226-3p	0.410015	0.423309	0.696706	-0.188274	0.286645	0.791689	0.983313	-0.0533894	0.451646
hsa-miR-485-5p	0.935007	0.968349	0.886667	0.311619	0.976657	-0.203389	1.16832	0.156655	-0.953302
hsa-miR-4523	0.200002	1.0333	0.851679	-0.1333	0.61664	0.90666	0.898324	0.581689	0.681674
hsa-miR-323b-3p	-0.0100637	0.0882773	1.06667	-0.333309	0.0416635	0.951662	0.598365	-0.373286	-0.603312
hsa-miR-3909	0.350045	0.328377	0.756682	-0.0382957	0.126709	0.531668	1.38333	0.0017302	-0.248292
hsa-miR-146a-5p	-0.399991	-0.296663	0.346645	-0.178364	-0.1333	0.191689	0.598365	-0.1333	0.456701
hsa-miR-5586-3p	0.365021	-0.53665	1.08168	-0.128293	-0.713344	0.51167	0.613343	-0.43328	0.591679
hsa-miR-3667-3p	1.39999	0.828307	0.541713	0.806695	0.506703	0.0416635	0.983313	0.331705	-0.0982848
hsa-miR-154-5p	0.639973	0.473319	0.591679	0.10165	0.251689	-0.323312	1.06833	0.40163	-0.533364
hsa-miR-125b-5p	0	0.103397	0.286645	0.171719	-0.103397	-0.153287	0.16337	0.311619	-0.298306
hsa-miR-2964a-3p	-0.930018	-1.00669	-0.0483757	-0.128293	-0.713344	0.981633	0.538339	-1.21332	0.53665
hsa-miR-4802-3p	0.639973	-0.51167	-0.0683269	0.141694	-0.318346	-0.348346	0.388355	0.0517201	-0.238298
hsa-let-7d-5p	-0.100036	0.158337	0.851679	-0.403377	0.0467006	0.541713	0.568324	0.111699	0.911653
hsa-miR-579	0.729966	0.198368	0.336626	1.06667	-0.183328	-0.0533894	0.763327	0.651683	-0.783331
hsa-miR-30c-5p	-0.534958	-0.136716	0.376624	-0.443288	-0.0783366	0.241718	-0.261711	0.246712	0.416624
hsa-miR-874	0.565012	0.143393	0.381616	0.111699	0.131721	-0.353323	0.713344	0.42664	-0.0333701
hsa-miR-3613-3p	0.0850167	-0.0816123	1.01664	-0.678342	0.0116388	0.286645	0.498353	-0.128293	0.386701
hsa-miR-424-3p	-0.499986	-0.436695	0.691623	-0.393306	-0.308361	0.696706	0.523361	0.00662118	0.846634
hsa-let-7a-2-3p	0.499986	1.44334	1.48166	0.091666	0.776694	1.27668	1.04831	0.221692	0.606632
hsa-miR-19a-5p	-0.880019	-0.381616	0.596649	-0.128293	-0.80331	0.871686	0.898324	-1.07834	0.0216219
hsa-miR-92a-2-5p	-1.01999	-1.05665	-0.333309	-0.128293	-0.468323	0.741661	0.538339	-0.968349	0.466653
hsa-miR-208a	-0.715015	-0.741661	1.17166	-0.128293	-0.468323	0.741661	0.538339	-0.968349	0.466653
hsa-miR-23b-5p	1.51999	1.86833	2.08668	0.871686	1.13166	1.41164	1.88834	-0.323312	0.646624

## Sheet: Table_S9
Table S9 | Differentialy expressed miRNAs and the number of genes involved in different GO functions
Sample Description	Functional miRNAs	Biological Process (BP)	Cellular Component (CC)	Molecular Function (MF)
Upregulated miRNAs in E. coli-exposed hPBMCs	13	96	9	0
Downregulated miRNAs in E. coli-exposed hPBMCs	21	135	36	36
Upregulated miRNAs in B. pseduomallei-exposed hPBMCs	8	43	13	18
Downregulated miRNAs in B. pseduomallei-exposed hPBMCs	19	81	18	28
Upregulated miRNAs in F. tularensis-exposed hPBMCs	14	92	26	27
Downregulated miRNAs in F. tularensis-exposed hPBMCs	12	0	0	0

## Sheet: Table_S10
Table S10 | Proposed new broader category for each biological process GO term
Biological_process (GO term)	Proposed new broader category term
regulation_of_transcription	regulation_of_transcription_related
regulation_of_RNA_metabolic_process
regulation_of_transcription,_DNA-dependent	regulation_of_transcription_related
transcription	transcription_related
intracellular_signaling_cascade
regulation_of_transcription_from_RNA_polymerase_II_promoter	regulation_of_transcription_related
cell_adhesion
biological_adhesion	adhesion_related
phosphate_metabolic_process
phosphorus_metabolic_process
positive_regulation_of_macromolecule_biosynthetic_process	macromolecule_biosynthetic_process_regulation
cellular_biosynthetic_process_regulation	cellular_biosynthetic_process_regulation
positive_regulation_of_biosynthetic_process	biosynthetic_process_regulation
positive_regulation_of_macromolecule_metabolic_process	macromolecule_metabolic_process_regulation
response_to_organic_substance
phosphorylation	phosphorylation_related
positive_regulation_of_transcription	regulation_of_transcription_related
positive_regulation_of_gene_expression
positive_regulation_of_nucleobase,_nucleoside,_nucleotide_and_nucleic_acid_metabolic_process	nucleobase,_nucleoside,_nucleotide_and_nucleic_acid_metabolic_process_related
positive_regulation_of_nitrogen_compound_metabolic_process
protein_amino_acid_phosphorylation	phosphorylation_related
positive_regulation_of_transcription,_DNA-dependent	regulation_of_transcription_related
positive_regulation_of_RNA_metabolic_process	RNA_metabolic_process_regulation
negative_regulation_of_gene_expression
cell-cell_adhesion	adhesion_related
response_to_hormone_stimulus
response_to_endogenous_stimulus
negative_regulation_of_transcription	regulation_of_transcription_related
regulation_of_phosphorylation
regulation_of_phosphorus_metabolic_process
regulation_of_phosphate_metabolic_process
negative_regulation_of_nucleobase,_nucleoside,_nucleotide_and_nucleic_acid_metabolic_process	nucleobase,_nucleoside,_nucleotide_and_nucleic_acid_metabolic_process_related
negative_regulation_of_nitrogen_compound_metabolic_process
homophilic_cell_adhesion	adhesion_related
transmission_of_nerve_impulse
negative_regulation_of_transcription,_DNA-dependent	regulation_of_transcription_related
negative_regulation_of_RNA_metabolic_process	RNA_metabolic_process_regulation
synaptic_transmission
positive_regulation_of_transcription_from_RNA_polymerase_II_promoter	regulation_of_transcription_related
chromatin_organization
vasculature_development
enzyme_linked_receptor_protein_signaling_pathway
regulation_of_kinase_activity
embryonic_organ_development
transmembrane_receptor_protein_tyrosine_kinase_signaling_pathway
sensory_organ_development
blood_vessel_development
negative_regulation_of_transcription_from_RNA_polymerase_II_promoter	regulation_of_transcription_related
cell_migration
cellular_response_to_hormone_stimulus
response_to_insulin_stimulus	insulin_related
camera-type_eye_development	eye_development_related
eye_development	eye_development_related
embryonic_organ_morphogenesis
response_to_peptide_hormone_stimulus
glycoprotein_biosynthetic_process
regulation_of_protein_amino_acid_phosphorylation	phosphorylation_related
in_utero_embryonic_development
purine_nucleotide_metabolic_process
insulin_receptor_signaling_pathway	insulin_related
cellular_response_to_insulin_stimulus	insulin_related
positive_regulation_of_cell_motion
respiratory_system_development
skeletal_system_morphogenesis
biopolymer_glycosylation	glycosylation_related
protein_amino_acid_glycosylation	glycosylation_related
glycosylation	glycosylation_related
nucleoside_monophosphate_metabolic_process
artery_morphogenesis
embryonic_cranial_skeleton_morphogenesis
regulation_of_stress_fiber_formation
peptidyl-threonine_modification
cAMP_metabolic_process
regulation_of_actin_filament_bundle_formation
L-amino_acid_transport
cell-substrate_junction_assembly
protein_amino_acid_O-linked_glycosylation	glycosylation_related
regulation_of_generation_of_precursor_metabolites_and_energy
cyclic_nucleotide_metabolic_process
protein_amino_acid_hydroxylation
substrate_adhesion-dependent_cell_spreading
reproductive_process_in_a_multicellular_organism
multicellular_organism_reproduction
cell_motion
induction_of_programmed_cell_death	programmed_cell_death_related
induction_of_apoptosis	programmed_cell_death_related
gamete_generation
cell_projection_organization	cell_projection_related
spermatogenesis
male_gamete_generation
regulation_of_small_GTPase_mediated_signal_transduction
positive_regulation_of_protein_metabolic_process	protein_metabolic_process_regulation
positive_regulation_of_cellular_protein_metabolic_process	protein_metabolic_process_regulation
neuron_projection_morphogenesis	neuron_projection_related
neuron_projection_development	neuron_projection_related
cell_projection_morphogenesis	cell_projection_related
cell_part_morphogenesis	cell_morphogenesis_related
cell_morphogenesis_involved_in_neuron_differentiation	neuron_differentiation_related
cell_morphogenesis_involved_in_differentiation	cell_morphogenesis_related
axonogenesis	axonogenesis_related
regulation_of_neuron_differentiation	neuron_differentiation_related
regulation_of_neurogenesis
regulation_of_cell_projection_organization	cell_projection_related
regulation_of_cell_morphogenesis	cell_morphogenesis_related
protein_amino_acid_autophosphorylation
transmembrane_receptor_protein_serine/threonine_kinase_signaling_pathway
regulation_of_protein_transport
regulation_of_neuron_projection_development	neuron_projection_related
regulation_of_cell_morphogenesis_involved_in_differentiation	cell_morphogenesis_related
cell_recognition
regulation_of_axonogenesis	axonogenesis_related
protein_targeting_to_membrane
regulation_of_protein_import_into_nucleus,_translocation	protein_import_into_nucleus_related
positive_regulation_of_protein_import_into_nucleus,_translocation	protein_import_into_nucleus_related
axon_regeneration
protein_localization
negative_regulation_of_macromolecule_metabolic_process	macromolecule_metabolic_process
macromolecule_catabolic_process	macromolecule_catabolic_process_related
cellular_macromolecule_catabolic_process	macromolecule_catabolic_process_related
protein_transport
establishment_of_protein_localization
proteolysis_involved_in_cellular_protein_catabolic_process	protein_catabolic_process_related
cellular_protein_catabolic_process	protein_catabolic_process_related
protein_catabolic_process	protein_catabolic_process_related
chromosome_organization
modification-dependent_macromolecule_catabolic_process	macromolecule_catabolic_process_related
modification-dependent_protein_catabolic_process	protein_catabolic_process_related
intracellular_transport
negative_regulation_of_macromolecule_biosynthetic_process	macromolecule_biosynthetic_process_regulation
negative_regulation_of_biosynthetic_process	biosynthetic_process_regulation
negative_regulation_of_cellular_biosynthetic_process	cellular_biosynthetic_process_regulation
cytoskeleton_organization
regulation_of_growth
chromatin_modification
membrane_organization
embryonic_morphogenesis
regulation_of_system_process
neuron_development
actin_filament-based_process
transcription,_DNA-dependent	transcription_related
RNA_biosynthetic_process
small_GTPase_mediated_signal_transduction
nitrogen_compound_biosynthetic_process
response_to_drug
actin_cytoskeleton_organization
transcription_from_RNA_polymerase_II_promoter	transcription_related
regulation_of_nervous_system_development
negative_regulation_of_signal_transduction
negative_regulation_of_cell_communication
endocytosis
membrane_invagination
protein_modification_by_small_protein_conjugation_or_removal
regulation_of_transmission_of_nerve_impulse
regulation_of_neurological_system_process
extracellular_structure_organization
sensory_perception_of_sound
sensory_perception_of_mechanical_stimulus
protein_modification_by_small_protein_conjugation
lung_development
respiratory_tube_development
response_to_protein_stimulus
protein_ubiquitination
Golgi_vesicle_transport
regulation_of_synaptic_transmission
vitamin_metabolic_process
ossification
purine_ribonucleoside_triphosphate_metabolic_process
regulation_of_developmental_growth
inner_ear_morphogenesis
ear_morphogenesis
cartilage_development
inner_ear_development
ATP_biosynthetic_process
ear_development
cellular_amino_acid_derivative_biosynthetic_process
response_to_mechanical_stimulus
post-Golgi_vesicle-mediated_transport
neuromuscular_process
regulation_of_synaptic_plasticity
lipid_modification
coenzyme_biosynthetic_process
response_to_unfolded_protein
collagen_fibril_organization
neuromuscular_process_controlling_balance
water-soluble_vitamin_metabolic_process
pyruvate_metabolic_process
glutamine_family_amino_acid_metabolic_process
chondrocyte_differentiation
regulation_of_axon_extension
water-soluble_vitamin_biosynthetic_process
vitamin_biosynthetic_process
mechanoreceptor_differentiation
detection_of_mechanical_stimulus_involved_in_sensory_perception_of_sound
positive_regulation_of_glycogen_biosynthetic_process
positive_regulation_of_lipid_catabolic_process
detection_of_mechanical_stimulus_involved_in_sensory_perception
regulation_of_chondrocyte_differentiation
regulation_of_polysaccharide_biosynthetic_process
regulation_of_glucan_biosynthetic_process
regulation_of_glycogen_biosynthetic_process
phosphoinositide_phosphorylation
regulation_of_polysaccharide_metabolic_process
lipid_phosphorylation
detection_of_mechanical_stimulus
glutamate_metabolic_process
pyridoxine_biosynthetic_process
vitamin_B6_biosynthetic_process
pyridoxine_metabolic_process
vitamin_B6_metabolic_process
regulation_of_cell_proliferation
cell_death
death
apoptosis	programmed_cell_death_related
programmed_cell_death	programmed_cell_death_related
cell_motility
localization_of_cell
mRNA_metabolic_process
positive_regulation_of_cell_proliferation
blood_vessel_morphogenesis
chordate_embryonic_development
embryonic_development_ending_in_birth_or_egg_hatching
cell_proliferation
angiogenesis
skeletal_system_development
mRNA_processing
pattern_specification_process
positive_regulation_of_developmental_process
RNA_splicing	RNA_splicing_related
regulation_of_gene-specific_transcription	regulation_of_transcription_related
nuclear_mRNA_splicing,_via_spliceosome	RNA_splicing_related
RNA_splicing,_via_transesterification_reactions	RNA_splicing_related
RNA_splicing,_via_transesterification_reactions_with_bulged_adenosine_as_nucleophile	RNA_splicing_related
chemotaxis
taxis
ectoderm_development
embryonic_skeletal_system_development
positive_regulation_of_gene-specific_transcription	regulation_of_transcription_related
regulation_of_specific_transcription_from_RNA_polymerase_II_promoter	regulation_of_transcription_related
axon_guidance
induction_of_apoptosis_by_extracellular_signals	programmed_cell_death_related
bone_development
development_of_primary_sexual_characteristics
embryonic_placenta_development
protein_secretion
negative_regulation_of_specific_transcription_from_RNA_polymerase_II_promoter	regulation_of_transcription_related
positive_regulation_of_epithelial_cell_proliferation
negative_regulation_of_gene-specific_transcription	regulation_of_transcription_related
positive_regulation_of_specific_transcription_from_RNA_polymerase_II_promoter	regulation_of_transcription_related
placenta_development
immunoglobulin_secretion
regulation_of_myelination
positive_regulation_of_vascular_endothelial_growth_factor_receptor_signaling_pathway	vascular_endothelial_growth_factor_receptor_signaling_pathway_related
regulation_of_fibroblast_growth_factor_receptor_signaling_pathway
trabecula_formation
face_morphogenesis	face_and_head_development
regulation_of_vascular_endothelial_growth_factor_receptor_signaling_pathway	vascular_endothelial_growth_factor_receptor_signaling_pathway_related
sprouting_angiogenesis
head_morphogenesis	face_and_head_development
keratinocyte_proliferation
face_development	face_and_head_development
regulation_of_glycolysis
regulation_of_apoptosis	programmed_cell_death_related
regulation_of_programmed_cell_death	programmed_cell_death_related
regulation_of_cell_death	programmed_cell_death_related
RNA_processing
cation_transport	ion_transport
metal_ion_transport	ion_transport
monovalent_inorganic_cation_transport	ion_transport
ncRNA_metabolic_process
ubiquitin-dependent_protein_catabolic_process	protein_catabolic_process_related
cell_division
lipid_localization
posttranscriptional_regulation_of_gene_expression
lipid_transport
potassium_ion_transport	ion_transport
ncRNA_processing
regulation_of_cell_motion
regionalization
tRNA_metabolic_process
striated_muscle_tissue_development	muscle_tissue_development_related
muscle_tissue_development	muscle_tissue_development_related
skeletal_muscle_tissue_development	muscle_tissue_development_related
skeletal_muscle_organ_development
histone_modification
covalent_chromatin_modification
chromatin_assembly_or_disassembly
sodium_ion_transport	ion_transport
gene_silencing_by_RNA
protein_amino_acid_acetylation
gene_silencing
protein_amino_acid_acylation
regulation_of_multicellular_organism_growth
tRNA_processing
regulation_of_gene_expression,_epigenetic
posttranscriptional_gene_silencing	posttranscriptional_gene_silencing_related
posttranscriptional_gene_silencing_by_RNA	posttranscriptional_gene_silencing_related
phospholipid_transport
regulation_of_anti-apoptosis	programmed_cell_death_related
peptidyl-serine_modification
histone_acetylation
positive_regulation_of_cell_size
regulation_of_G-protein_coupled_receptor_protein_signaling_pathway
spermatid_development
spermatid_differentiation
pre-microRNA_processing
gene_silencing_by_miRNA,_production_of_miRNAs	gene_silencing_by_miRNA_related
dsRNA_fragmentation
gene_silencing_by_miRNA	gene_silencing_by_miRNA_related
steroid_catabolic_process
ubiquitin_cycle
response_to_dsRNA
RNA_3'-end_processing
base-excision_repair
positive_regulation_of_DNA_replication
negative_regulation_of_cell_projection_organization	cell_projection_related
microtubule-based_transport
miRNA_catabolic_process
RNA_interference,_targeting_of_mRNA_for_destruction
miRNA_metabolic_process
RNA_splicing,_via_endonucleolytic_cleavage_and_ligation	RNA_splicing_related
tRNA_splicing,_via_endonucleolytic_cleavage_and_ligation	RNA_splicing_related
compartment_specification

[truncated: 1 more sheets: Table_S11]
